# Supplementary material for: Antibacterial and Antibiofilm Activities of Tryptoquivalines and Meroditerpenes Isolated from the Marine-Derived Fungi Neosartorya paulistensis, N. laciniosa, N. tsunodae, and the Soil Fungi N. fischeri and N. siamensis
Source: PubMed Central journal article supplement (PMC3944517; doi:10.3390/md12020822), 2014-01-28
Supplement: marinedrugs-12-00822-s001.pdf [file marinedrugs-12-00822-s001.pdf]

## Supplementary Information

**Figure S1.**  $^1\text{H}$  NMR spectrum of compound **1d** (DMSO, 300.13 MHz).

**Figure S2.**  $^{13}\text{C}$  NMR spectrum of compound **1d** (DMSO, 75.47 MHz).

**Figure S3.**  $^1\text{H}$  NMR spectrum of compound **5** ( $\text{CDCl}_3$ , 300.13 MHz).

**Figure S4.**  $^{13}\text{C}$  NMR spectrum of compound **5** ( $\text{CDCl}_3$ , 75.47 MHz).

**Figure S1.**  $^1\text{H}$  NMR spectrum of compound **1d** (DMSO, 300.13 MHz).

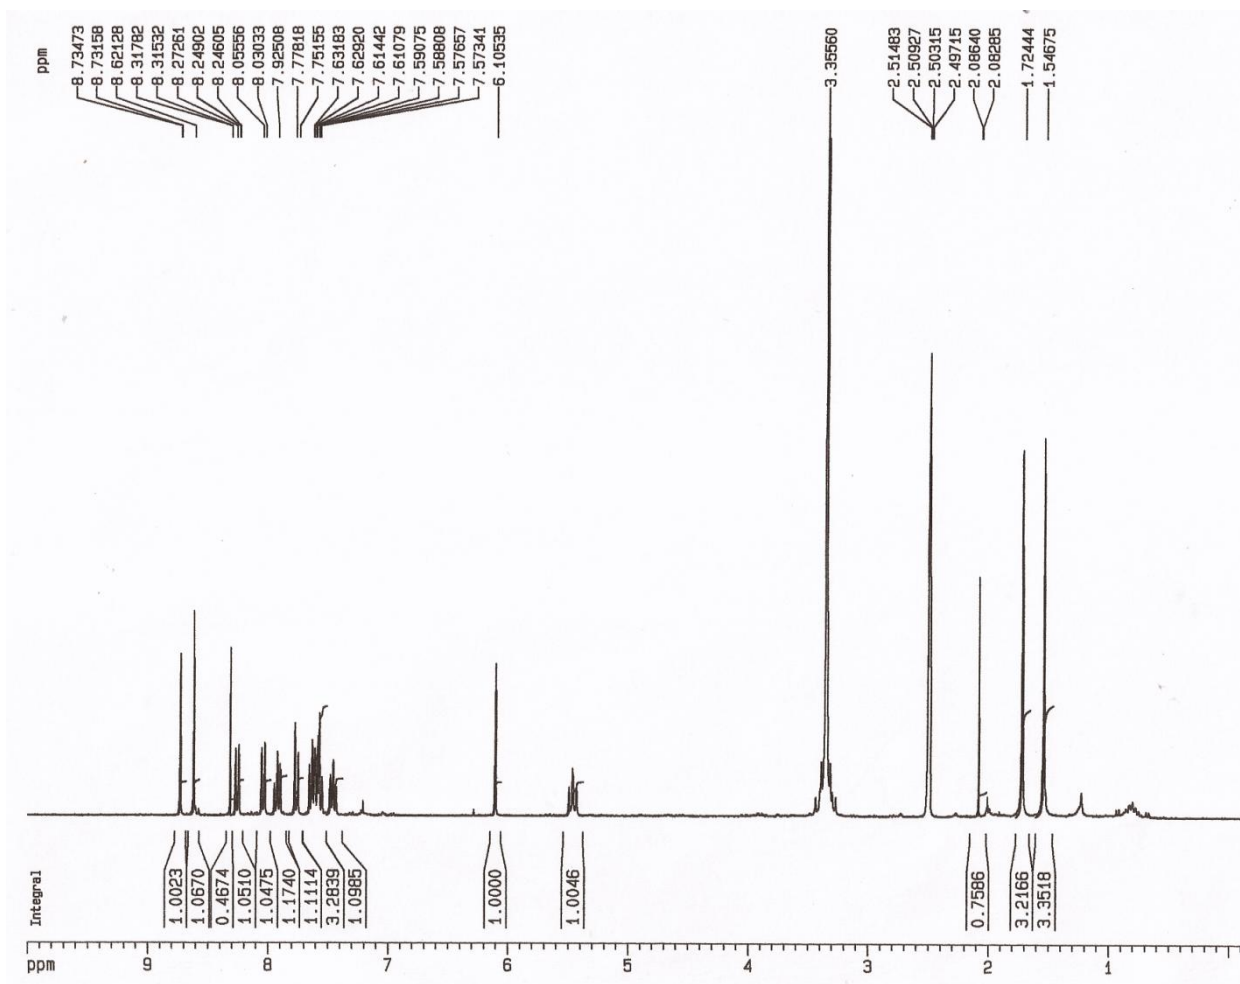

**Figure S2.**  $^{13}\text{C}$  NMR spectrum of compound **1d** (DMSO, 75.47 MHz).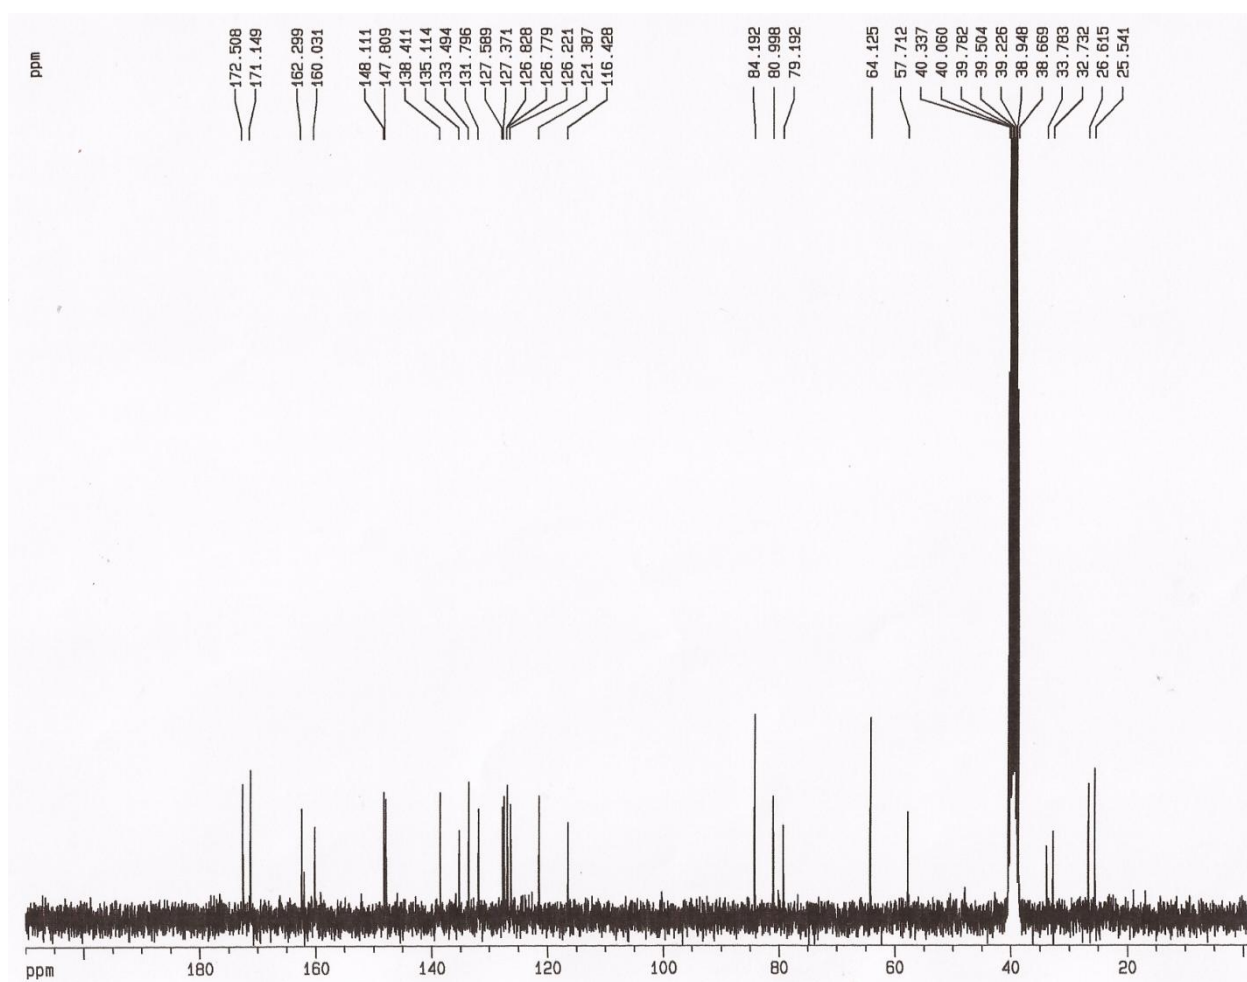

Figure S3.  $^1\text{H}$  NMR spectrum of compound 5 ( $\text{CDCl}_3$ , 300.13 MHz).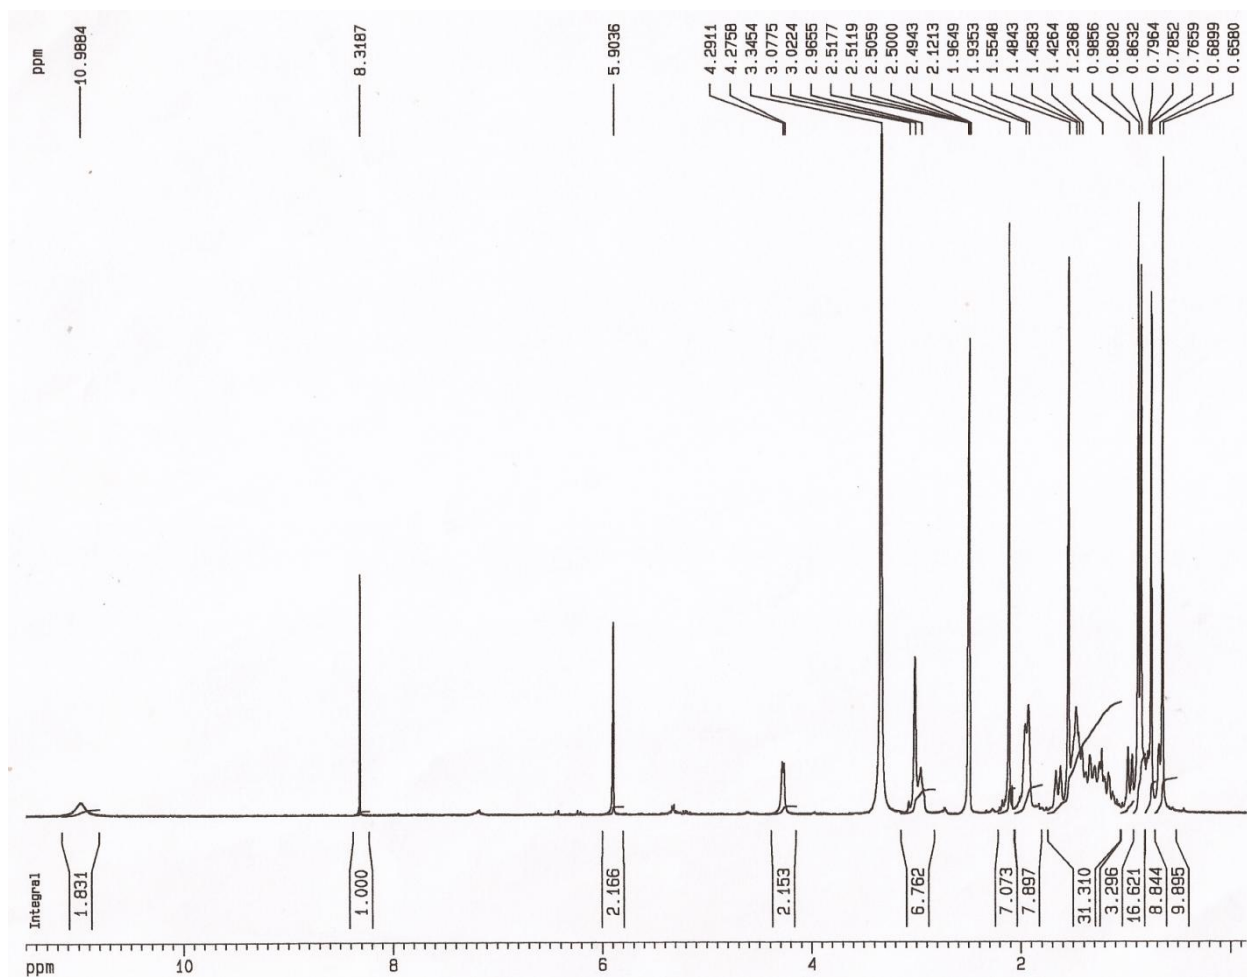

**Figure S4.**  $^{13}\text{C}$  NMR spectrum of compound **5** ( $\text{CDCl}_3$ , 75.47 MHz).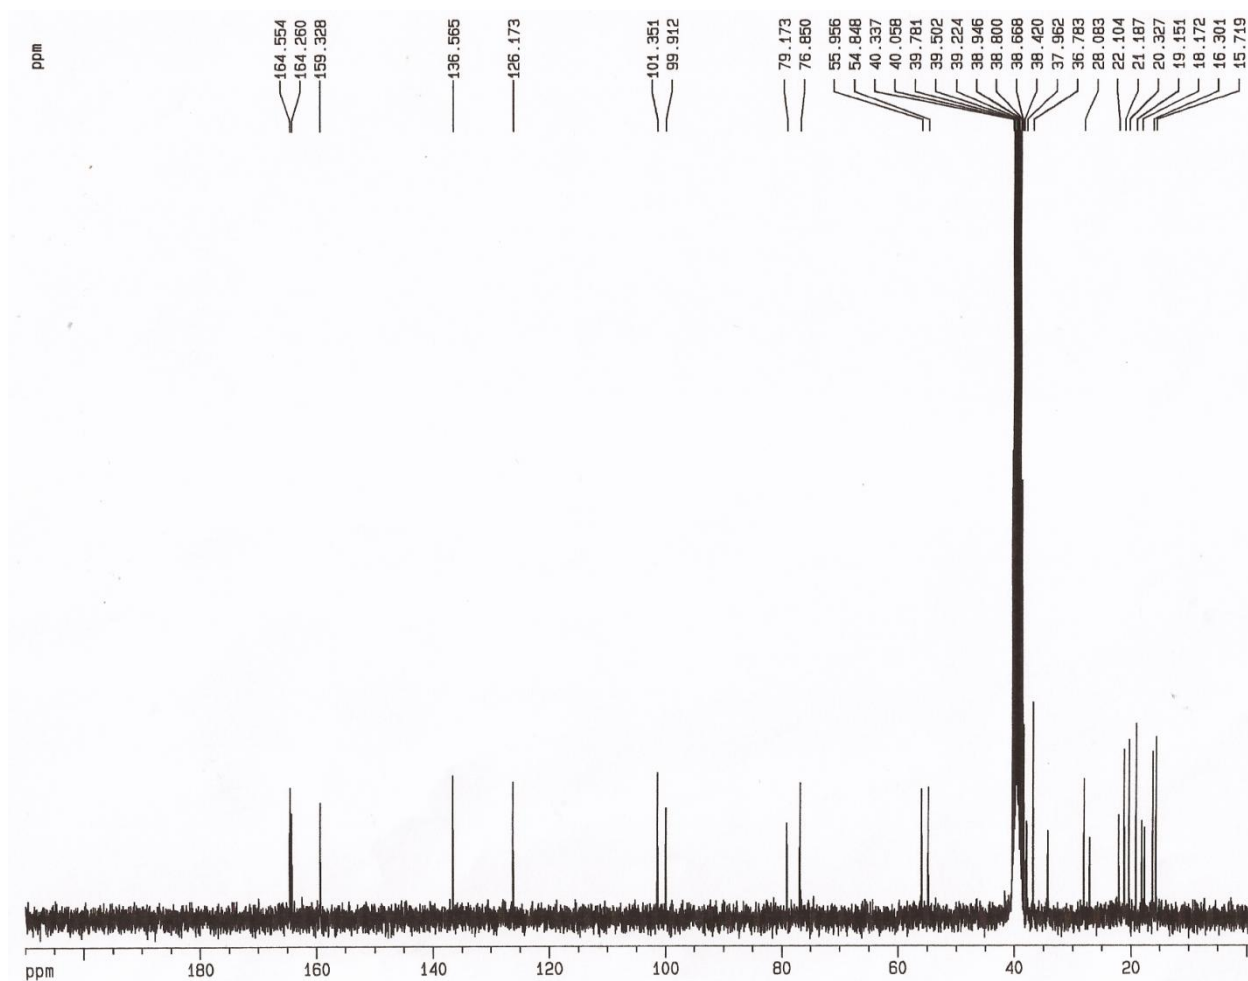

© 2014 by the authors; licensee MDPI, Basel, Switzerland. This article is an open access article distributed under the terms and conditions of the Creative Commons Attribution license (<http://creativecommons.org/licenses/by/3.0/>).
